# Supplementary material for: A Ni-doping-induced phase transition and electron evolution in cobalt hexacyanoferrate as a stable cathode for sodium-ion batteries
Source: Royal Society of Chemistry journal article supplement (doi:10.1039/d0cp05665k), 2020-12-28
Supplement: d0cp05665k1.pdf [file d0cp05665k1.pdf]

## Supporting Information

### **Ni-doping induced phase transition and electron evolution in cobalt hexacyanoferrate as a stable cathode for sodium ion batteries**

Junjie Quan<sup>a</sup>, Enze Xu<sup>a</sup>, Hanwen Zhu<sup>a</sup>, Yajing Chang<sup>b</sup>, Yi Zhu<sup>a</sup>, Pengcheng Li<sup>a</sup>,  
Zhenjie Sun<sup>a</sup>, Dabin Yu<sup>b</sup>, Yang Jiang<sup>a,\*</sup>.

<sup>a</sup>School of Materials Science and Engineering and, Hefei University of Technology,  
230009, Hefei, People's Republic of China

<sup>b</sup>State Key Laboratory of Pulsed Power Laser Technology, National University of  
Defense Technology, 230037, Hefei, People's Republic of China  
Corresponding authors' E-mail: [apjiang@hfut.edu.cn](mailto:apjiang@hfut.edu.cn); (Y. Jiang).

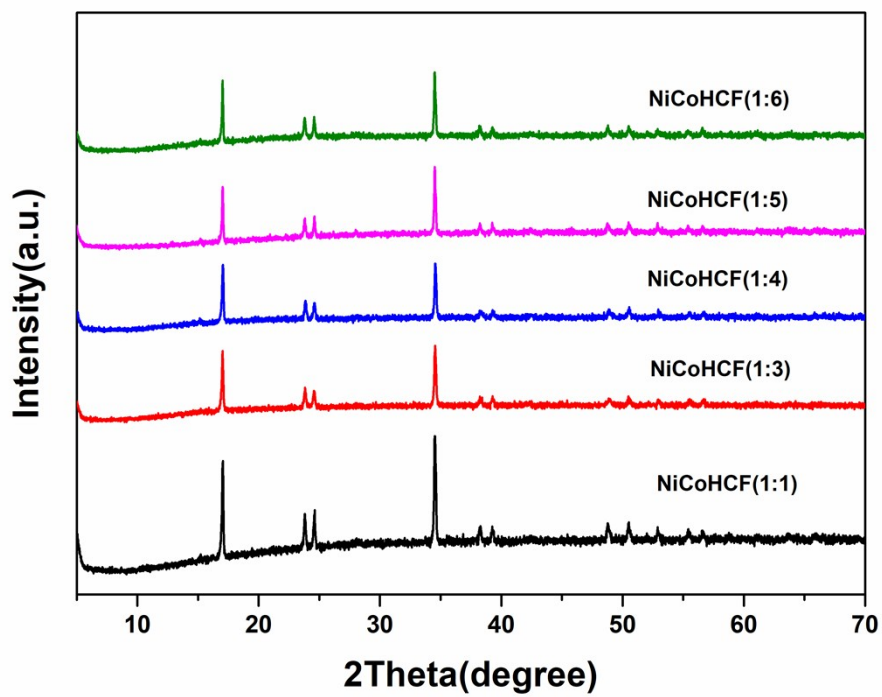

Fig. S1 XRD of NiCoHCF with different ratios of Nickel and Cobalt.

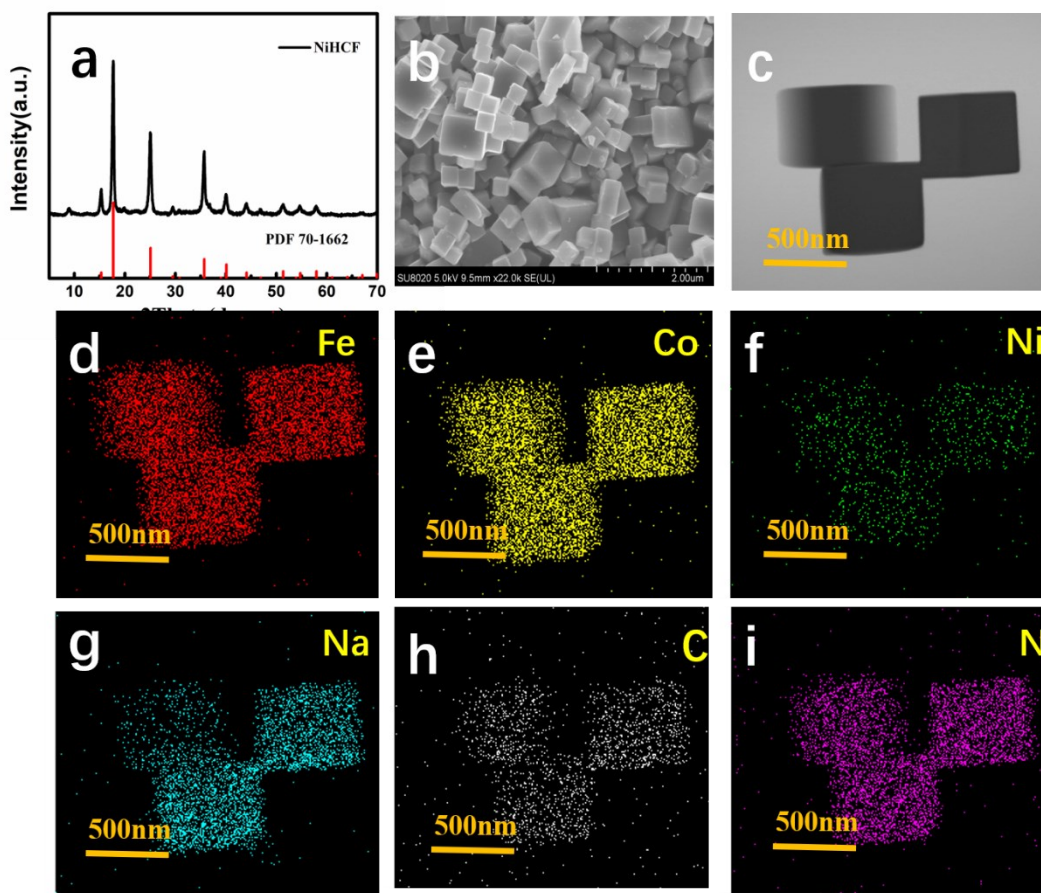

Fig. S2 (a) xrd pattern of NiHCF. (b) SEM image of CoHCF. (c-i) TEM image and corresponding Elemental mapping images of NCHCF.

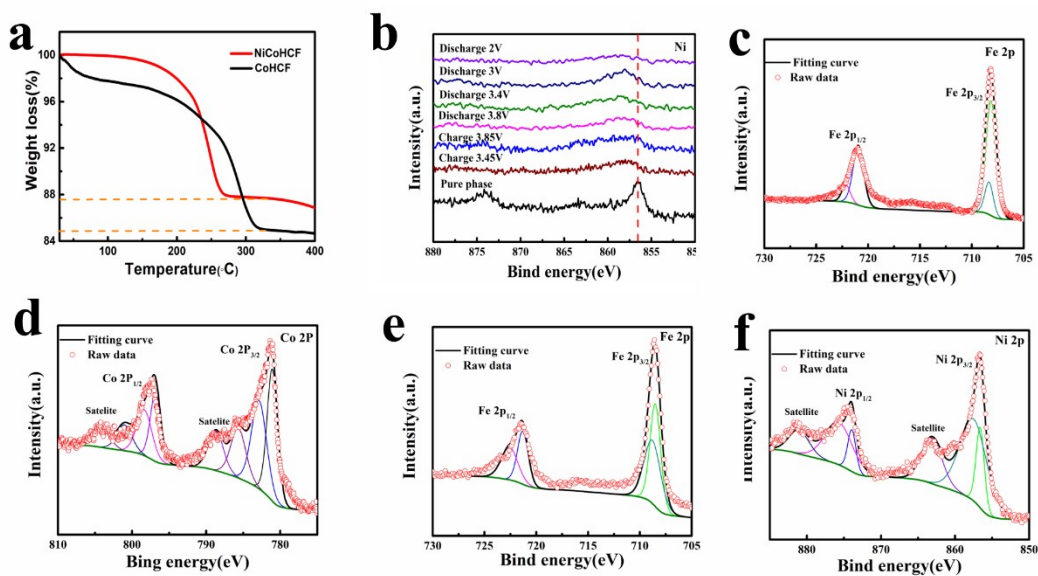

Fig. S3 (a) TGA curves of CoHCF and NCHCF. (b) XPS spectra of Ni in NCHCF. (c, d) Fe 2p, Co 2p XPS spectrum of CoHCF. (e, f) Fe 2p, Ni 2p XPS spectrum of CoHCF.

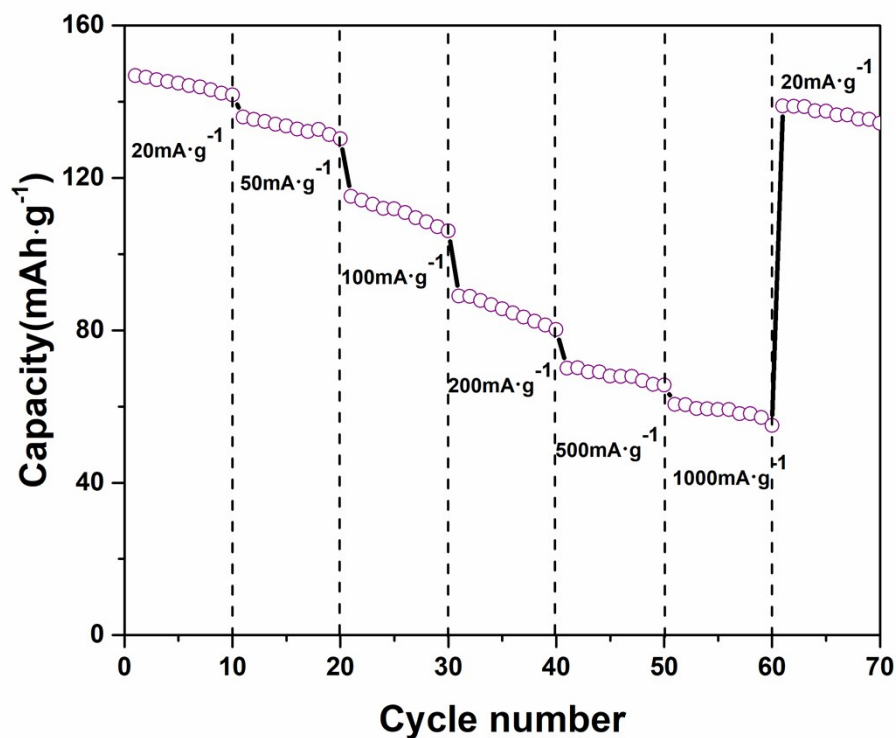

Fig. S4 Rate performance of CoHCF.

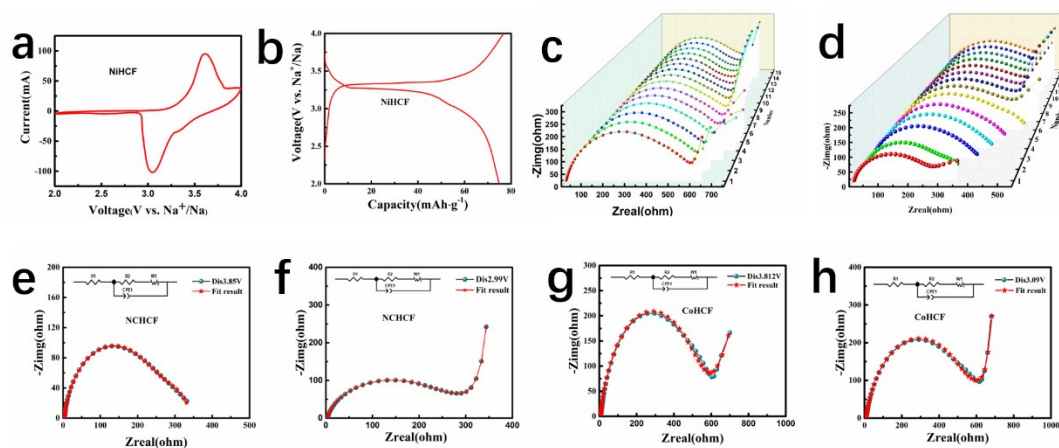

Fig. S5 CV curve (a) and charge-discharge profile (b) of NiHCF. In-situ EIS of CoHCF(c) and NCHCF(d) during the first discharging process. (e-h) Nyquist profile and fitting curve of CoHCF and NCHCF.

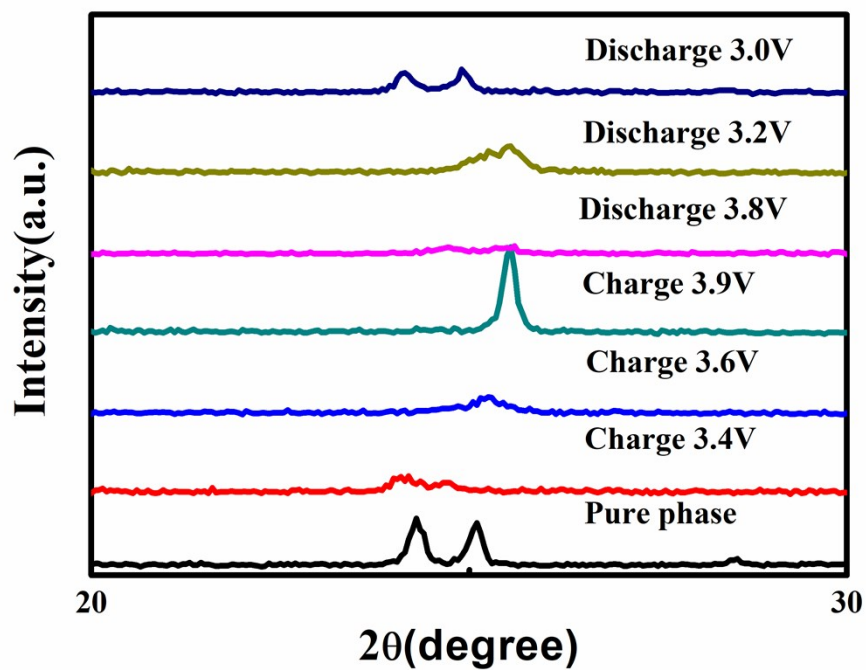

Fig. S6 XRD of NiCoHCF with different ratios of Nickel and Cobalt.

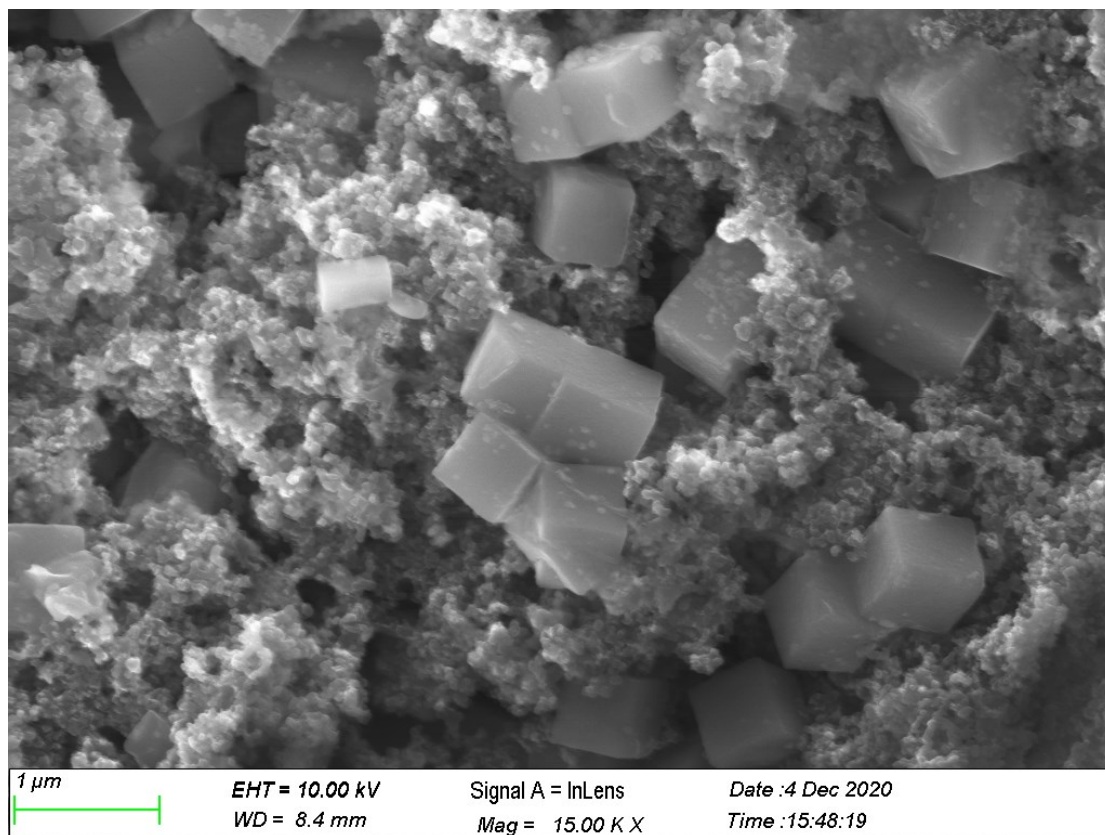

Fig. S7 The SEM image of NiCoHCF electrode after 10 cycles at  $100 \text{ mA} \cdot \text{g}^{-1}$

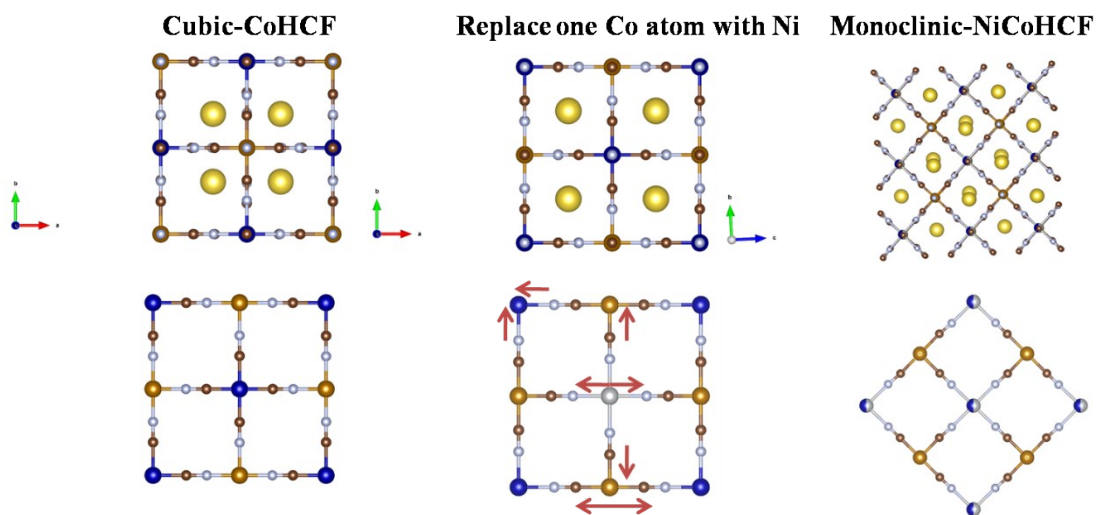

**Fig. S8 bond length change during nickel substitution**

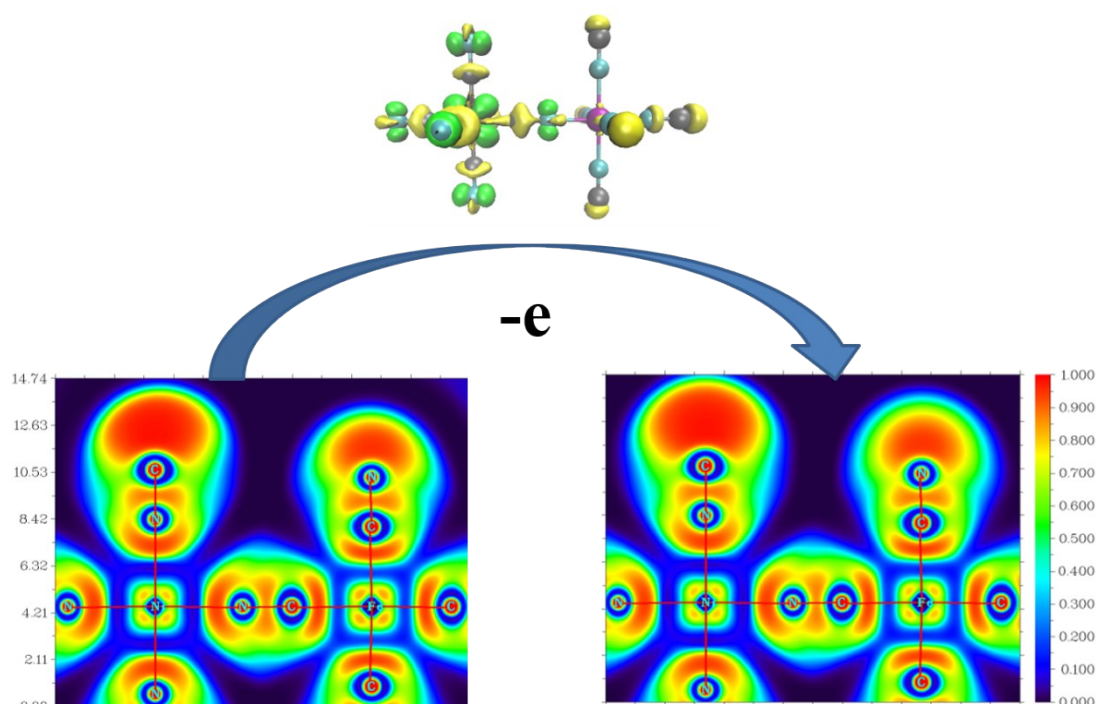

**Fig. S9 Charge density difference and corresponding electron density projection drawing of NiHCF.**

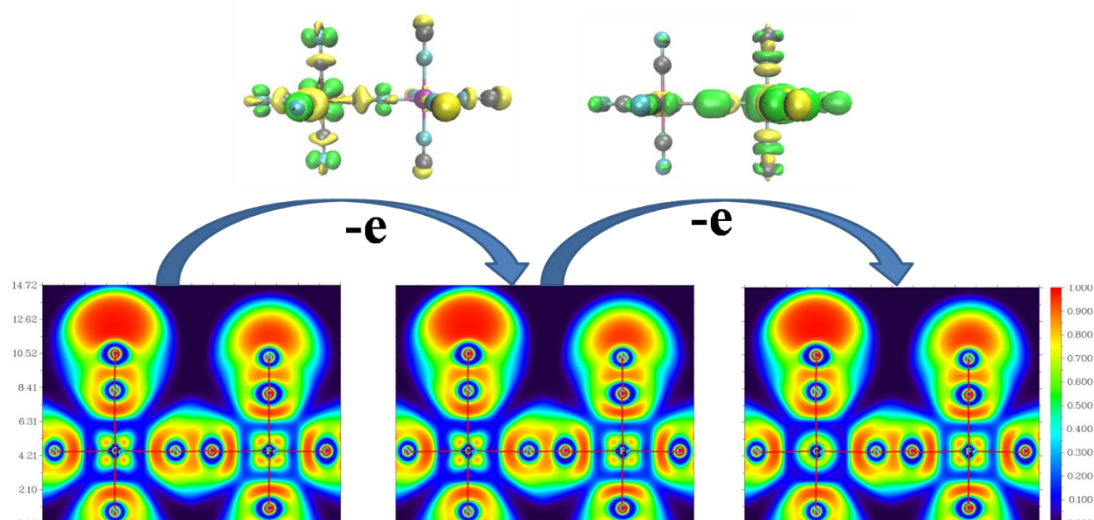

**Fig. S10** Charge density difference and corresponding electron density projection drawing of CoHCF

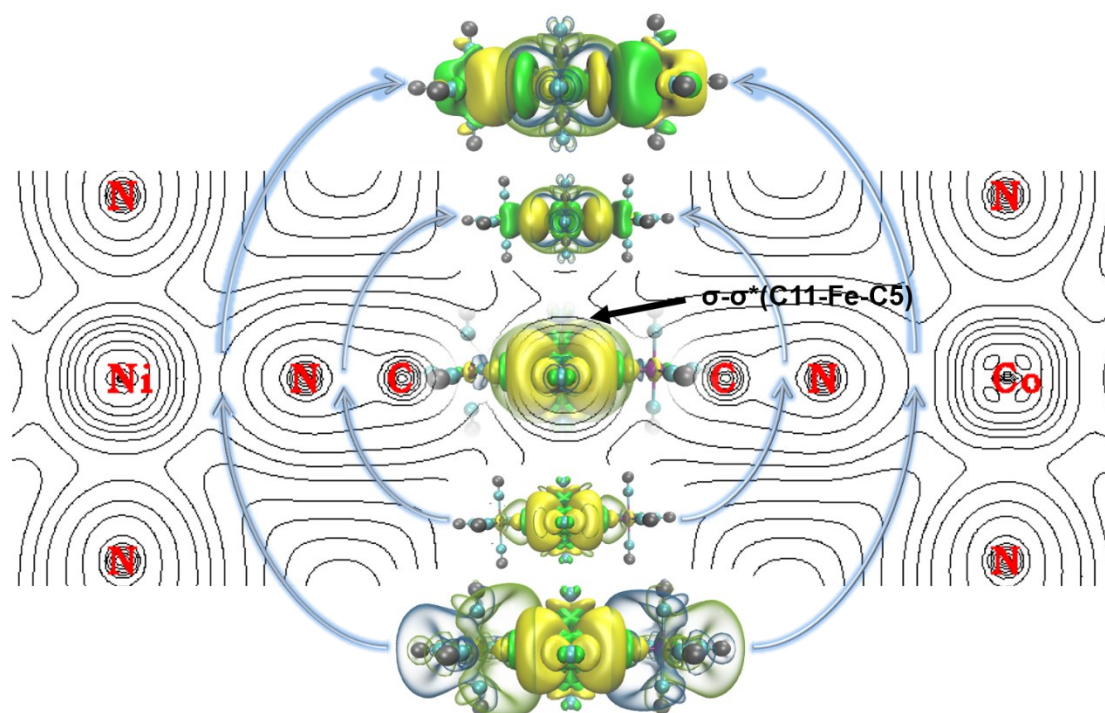

**Yellow solid isosurface**——Positive wave function of bonding orbital  
**Green solid isosurface**——Negative wave function of bonding orbital  
**Yellow transparent isosurface**——Positive wave function of Anti-bonding orbital  
**Blue transparent isosurface**——Negative wave function of Anti-bonding orbital

**Fig. S11** Wavefunction interaction between electron donor and acceptor related to Fe-C molecular orbital.

Table. S1 Element contents of CoHCF and NCHCF

| sample | ICP % wt. |      |       |       | Elemental analysis % wt. |       |       | TG % wt. |
|--------|-----------|------|-------|-------|--------------------------|-------|-------|----------|
|        | Na        | Ni   | Co    | Fe    | C                        | N     | H     | H2O      |
| CoHCF  | 10.71     |      | 17.83 | 15.04 | 20.53                    | 23.67 | 1.304 | 15.4     |
| NCHCF  | 11.87     | 1.23 | 16.54 | 15.78 | 21.03                    | 24.03 | 1.161 | 12.1     |

**Table S2 Structural parameters of CoHCF, NiCoHCF from Rietveld analysis**

**Sample-CoHCF**

**Lattice parameter:** a=b=c=10.24432 Å, and  $\alpha=\beta=\gamma=90^\circ$

**Rwp=9.2%, Rp=8.4%,  $\chi^2=10.91$**

| Atom | x    | y      | z     | Occupancy | Uiso(Å <sup>2</sup> ) |
|------|------|--------|-------|-----------|-----------------------|
| Fe1  | 0.5  | 0.5    | 0.5   | 1         | 0.0634                |
| Co1  | 0.5  | 1      | 0.5   | 1         | 0.0712                |
| Na1  | 0.75 | 0.75   | 0.75  | 1         | 0.0343                |
| O1   | 0.5  | 1      | 0.725 | 0.17      | 0.0655                |
| N1   | 0.5  | 0.7967 | 0.5   | 0.83      | 0.0872                |
| C1   | 0.5  | 0.6848 | 0.5   | 1         | 0.0521                |

**Sample NCHCF**

**Lattice parameter:** a=10.44307 Å, b=7.43999 Å, c=7.21542 Å,  $\alpha=\beta=\gamma=90^\circ$  and  $\gamma=91.95639^\circ$

**Rwp=5.3%, Rp=4.6%,  $\chi^2=5.64$**

| Atom | x   | y   | z   | Occupancy | Uiso(Å <sup>2</sup> ) |
|------|-----|-----|-----|-----------|-----------------------|
| Fe1  | 0.5 | 0   | 1   | 1         | 0.0085                |
| Ni1  | 0.5 | 0.5 | 0.5 | 0.3       | 0.0079                |



|            |               |               |                |            |               |
|------------|---------------|---------------|----------------|------------|---------------|
| <b>Co1</b> | <b>0.5</b>    | <b>0.5</b>    | <b>0.5</b>     | <b>0.7</b> | <b>0.0199</b> |
| <b>Na1</b> | <b>0.2658</b> | <b>0.4554</b> | <b>-0.0022</b> | <b>1</b>   | <b>0.045</b>  |
| <b>O1</b>  | <b>0.239</b>  | <b>0.2252</b> | <b>0.2636</b>  | <b>1</b>   | <b>0.0442</b> |
| <b>N1</b>  | <b>0.5098</b> | <b>0.2969</b> | <b>0.7062</b>  | <b>1</b>   | <b>0.0104</b> |
| <b>N2</b>  | <b>0.296</b>  | <b>0.5068</b> | <b>0.5077</b>  | <b>1</b>   | <b>0.0101</b> |
| <b>N3</b>  | <b>0.5031</b> | <b>0.2944</b> | <b>0.2972</b>  | <b>1</b>   | <b>0.0119</b> |
| <b>C1</b>  | <b>0.5126</b> | <b>0.181</b>  | <b>0.8085</b>  | <b>1</b>   | <b>0.0141</b> |
| <b>C2</b>  | <b>0.1869</b> | <b>0.5115</b> | <b>0.5101</b>  | <b>1</b>   | <b>0.0118</b> |
| <b>C3</b>  | <b>0.504</b>  | <b>0.1848</b> | <b>0.1895</b>  | <b>1</b>   | <b>0.0167</b> |

Table. S3 Value of bond length

|       | Ni-N(Å) | Co-N(Å) | (Fe-C)≡N-Ni(Å) | (Fe-C)≡NCo(Å) |
|-------|---------|---------|----------------|---------------|
| NCHCF | 2.04774 | 1.95481 | 1.80671        | 1.89028       |
| CoHCF |         | 1.9742  |                | 1.86835       |

Table. S4 Sodium ion insertion voltage of CoHCF and NCHCF

| Sample | Voltage | Na0 → Na1 | Na1 → Na2 | Na2 → Na3 |
|--------|---------|-----------|-----------|-----------|
|        | CoHCF   |           | 3.81      | 2.84      |
| NCHCF  |         | 3.85      | 2.97      | 2.42      |

**Table S5 Interaction energy between donor orbital and acceptor orbital**

| Donor orbital            | Acceptor orbital           | E(2)/kcal·mol <sup>-1</sup> | E(j)-E(i)/a.u. | F(I,j)/a.u. |
|--------------------------|----------------------------|-----------------------------|----------------|-------------|
| $\sigma(\text{Fe1-C5})$  | $\sigma^*(\text{Fe1-C5})$  | 10.19                       | 1.28           | 0.146       |
|                          | $\sigma^*(\text{Co2-N4})$  | 6.93                        | 0.78           | 0.094       |
|                          | $\pi^*(\text{N4-C5})$      | 2.94                        | 1.65           | 0.091       |
| $\sigma(\text{Fe1-C11})$ | $\sigma^*(\text{Fe1-C11})$ | 13.30                       | 1.25           | 0.165       |
|                          | $\sigma^*(\text{Ni3-N10})$ | 6.47                        | 0.86           | 0.097       |
|                          | $\pi^*(\text{N10-C11})$    | 3.02                        | 1.66           | 0.092       |
| $\sigma(\text{Co2-N4})$  | $\sigma^*(\text{Fe1-C5})$  | 2.11                        | 1.34           | 0.068       |
|                          | $\sigma^*(\text{Co2-N4})$  | 4.21                        | 0.84           | 0.075       |
|                          | $\pi^*(\text{N4-C5})$      | 0.81                        | 1.71           | 0.048       |
| $\sigma(\text{Ni3-N10})$ | $\sigma^*(\text{Fe1-C11})$ | 2.53                        | 1.31           | 0.074       |
|                          | $\sigma^*(\text{Ni3-N10})$ | 1.45                        | 0.92           | 0.046       |
|                          | $\pi^*(\text{N10-C11})$    | 1.45                        | 1.72           | 0.063       |
| $\pi(\text{N4-C5})$      | $\sigma^*(\text{Fe1-C5})$  | 3.10                        | 1.88           | 0.098       |
|                          | $\sigma^*(\text{Co2-N4})$  | 3.48                        | 1.37           | 0.088       |
| $\pi(\text{N10-C11})$    | $\sigma^*(\text{Fe1-C11})$ | 3.72                        | 1.85           | 0.107       |
|                          | $\sigma^*(\text{Ni3-N10})$ | 2.63                        | 1.45           | 0.078       |

Table. S6 The reported PBA materials in the literature

| Sample                                                      | Charge/discharge plateaus          | Reversible capacity                              | Rate capability                                     | Refs.     |
|-------------------------------------------------------------|------------------------------------|--------------------------------------------------|-----------------------------------------------------|-----------|
| NaNiCoFe(CN) <sub>6</sub>                                   | 3.92/3.71V, 3.62/3.18V, 3.45/2.98V | 146mAh·g <sup>-1</sup> at 20mA·g <sup>-1</sup>   | 105mAh·g <sup>-1</sup> at 1A·g <sup>-1</sup>        | This work |
| Na <sub>1.95</sub> Fe[Fe(CN) <sub>6</sub> ] <sub>0.93</sub> | 3.76/3.53V, 3.02/2.87V             | 160 mAh·g <sup>-1</sup> at 50mA·g <sup>-1</sup>  | 60 mAh·g <sup>-1</sup> at 1.6A·g <sup>-1</sup>      | 1         |
| Na <sub>0.22</sub> Ni[Fe(CN) <sub>6</sub> ] <sub>0.76</sub> | 3.315/3.314V                       | 78 mAh·g <sup>-1</sup> at 17 mA·g <sup>-1</sup>  | 57.5 mAh·g <sup>-1</sup> at 4250 mA·g <sup>-1</sup> | 2         |
| NaCoFe(CN) <sub>6</sub>                                     | 3.89/3.73V, 3.42/3.12V             | 148 mAh·g <sup>-1</sup> at 20 mA·g <sup>-1</sup> | 60 mAh·g <sup>-1</sup> at 500 mA·g <sup>-1</sup>    | 3         |

|                         |                       |                                                                           |                                                                            |   |
|-------------------------|-----------------------|---------------------------------------------------------------------------|----------------------------------------------------------------------------|---|
| $\text{NaMnFe(CN)}_6$   | 3.85/3.57V,3.52/3.27V | 134 $\text{mAh}\cdot\text{g}^{-1}$ at 6<br>$\text{mA}\cdot\text{g}^{-1}$  | 45 $\text{mAh}\cdot\text{g}^{-1}$ at 4800<br>$\text{mA}\cdot\text{g}^{-1}$ | 4 |
| $\text{NaNiMnFe(CN)}_6$ | 3.83/3.49V,3.58/3.07V | 120 $\text{mAh}\cdot\text{g}^{-1}$ at 50<br>$\text{mA}\cdot\text{g}^{-1}$ | 78 $\text{mAh}\cdot\text{g}^{-1}$ at 1600<br>$\text{mA}\cdot\text{g}^{-1}$ | 5 |
| $\text{NaNiCoFe(CN)}_6$ | 3.9/3.73V,3.4/3.04V   | 92 $\text{mAh}\cdot\text{g}^{-1}$ at 50<br>$\text{mA}\cdot\text{g}^{-1}$  | 69 $\text{mAh}\cdot\text{g}^{-1}$ at 800<br>$\text{mA}\cdot\text{g}^{-1}$  | 6 |

#### Reference:

- (1) Y. You, X. Wu, Y. Yin, Y. Guo, High-quality Prussian blue crystals as superior cathode materials for room-temperature sodium-ion batteries, *Energy Environ. Sci.* 7 (2014) 1643-1647.
- (2) Y. You, X. Yu, Y. Yin, K. Nam, Y. Guo, Sodium iron hexacyanoferrate with high Na content as a Na-rich cathode material for Na-ion batteries, *Nano Res.* 8 (2015) 117-128.
- (3) L. Wang, J. Song, R. Qiao, L. A. Wray, M. A. Hossain, Y. Chuang, W. Yang, et. al., Rhombohedral Prussian White as Cathode for Rechargeable Sodium Ion Batteries, *J. Am. Chem. Soc.* 137 (2015) 2548–2554.
- (4) Y. Huang, M. Xie, J. Zhang, Z. Wang, Y. Jiang, G. Xiao, et. al., A novel border-rich Prussian blue synthesized by inhibitor control as cathode for sodium ion batteries, *Nano Energy* 39 (2017) 273–283.
- (5) X. Tang, H. Liu, D. Su, P. H. L. Notten, G. Wang, Hierarchical sodium-rich Prussian blue hollow nanospheres as high-performance cathode for sodium-ion batteries, *Nano Research* 11 (2018) 3979–3990.
- (6) H. Hu, W. Liu, M. Zhu, Y. Lin, Y. Liu, J. Zhang, et. al., Yolk-shell Prussian blue nanoparticles with fast ion diffusion for sodium-ion battery, *Materials Letters* 249 (2019) 206–209.
